# Supplementary material for: Mindfulness Facets, Sport Anxiety, and Psychological Outcomes in Ultra-Trail Runners: A Pre-Competition Study
Source: Research Square preprint supplement (doi:10.21203/rs.3.rs-8649683/v1), 2026-01-27
Supplement: Supplementary file 1 [file 8112bfc937bc43b1d6777e2c.docx]

**Supplementary Table S1**

*Single-Facet Versus Full-Model Standardized Coefficients (β) for Mindfulness Facets
Predicting Burnout, Fatigue, and Well-Being*

| **Outcome** | **Facet** | **β (Single- facet)** | **p** | **β (Full model)** | **Δβ** |
| --- | --- | --- | --- | --- | --- |
| Burnout | Observing | .073 | .284 | .111 | .038 |
| Burnout | Describing | -.138 | .044 | -.013 | .125 |
| Burnout | Acting with Awareness | -.351 | < .001 | -.301 | .050 |
| Burnout | Non- judging | -.371 | < .001 | -.251 | .120 |
| Burnout | Non- reactivity | -.190 | .005 | -.115 | .075 |
| Fatigue | Observing | .076 | .261 | .084 | .008 |
| Fatigue | Describing | -.057 | .409 | .029 | .086 |
| Fatigue | Acting with Awareness | -.230 | < .001 | -.196 | .034 |
| Fatigue | Non- judging | -.314 | < .001 | -.239 | .075 |
| Fatigue | Non- reactivity | -.140 | .039 | -.072 | .068 |
| Well-being | Observing | -.047 | .498 | -.050 | -.003 |
| Well-being | Describing | .016 | .816 | -.081 | -.097 |
| Well-being | Acting with Awareness | .185 | .007 | .154 | -.031 |
| Well-being | Non- judging | .373 | < .001 | .274 | -.099 |
| Well-being | Non- reactivity | .279 | < .001 | .203 | -.076 |

*Note.* β values are standardized coefficients. Single-facet models include one mindfulness facet plus covariates; the full model includes all five facets simultaneously (same covariates). Δβ = β_full − β_single. Covariates were age, sex, years of ultra-trail experience, and weekly training hours.
